# Supplementary material for: Dumbbell-like, core–shell and Janus-like configurations in Pd@Au@Pd three-shell nanoalloys: a molecular dynamics study
Source: Royal Society of Chemistry journal article supplement (doi:10.1039/c7qi00326a), 2017-01-01

## Supporting Information

Configurational energy and heat capacity for  $N=147$   $\text{Au}_{0.5}\text{Pd}_{0.5}$  three-shell nanoalloy versus temperature.

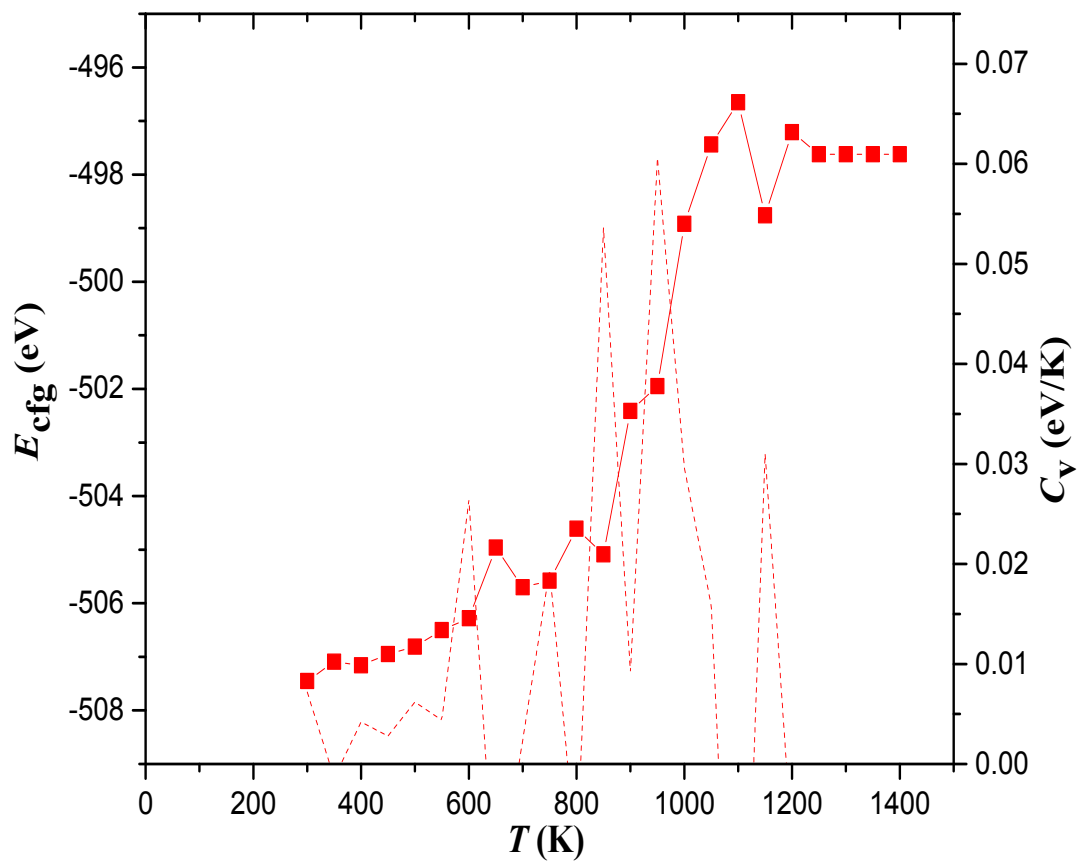

Supplement: c7qi00326a1.pdf [file c7qi00326a1.pdf]
